# Supplementary material for: Development and Application of Extraction Methods for LC-MS Quantification of Microcystins in Liver Tissue
Source: Toxins (Basel). 2020 Apr 19;12(4):263. doi: 10.3390/toxins12040263 (PMC7232250; doi:10.3390/toxins12040263)
Supplement: Supplementary file 1 [file toxins-12-00263-s001.pdf]

# Supplementary Materials: Development and Application of Extraction Methods for LC-MS Quantification of Microcystins in Liver Tissue

David Baliu-Rodriguez, Daria Kucheriavaia, Dilrukshika S. W. Palagama, Apurva Lad, Grace M. O'Neill, Johnna A. Birbeck, David J. Kennedy, Steven T. Haller, Judy A. Westrick and Dragan Isailovic

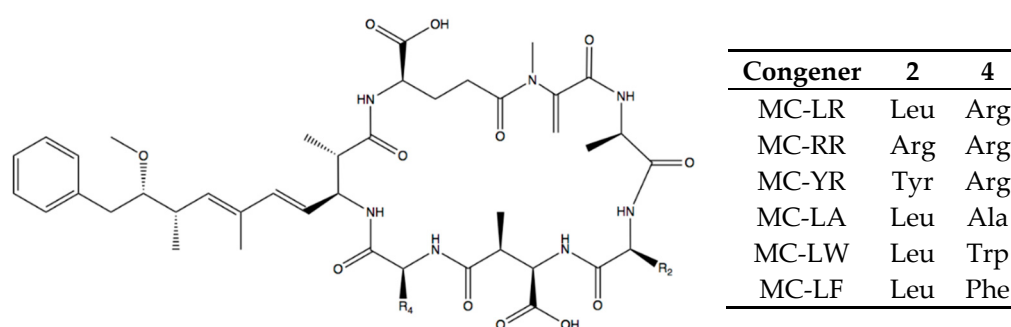

**Figure S1.** General MC structure. Amino acids at positions 2 and 4 vary depending on congener. Common congeners are shown in the inset.

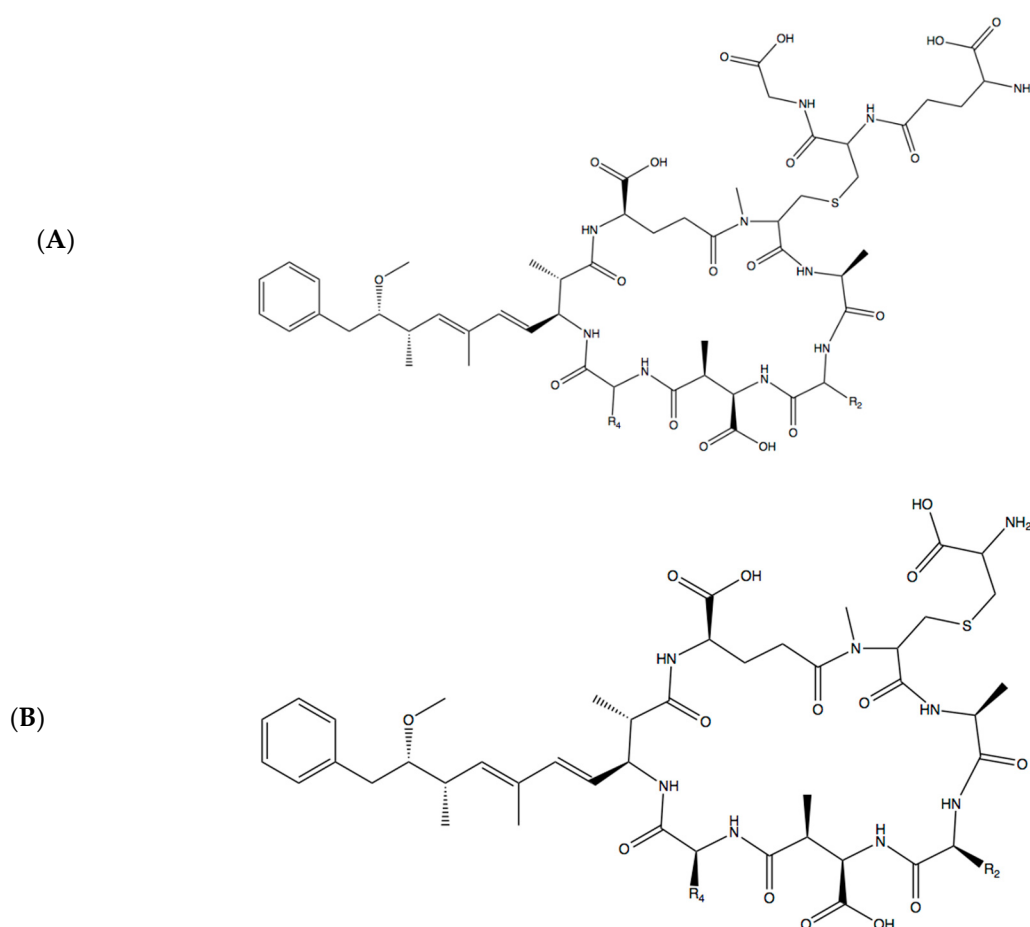

**Figure S2.** General structures of common MC adducts A) MC-GSH and B) MC-Cys. Primary amines are protonated at mobile phase pH.

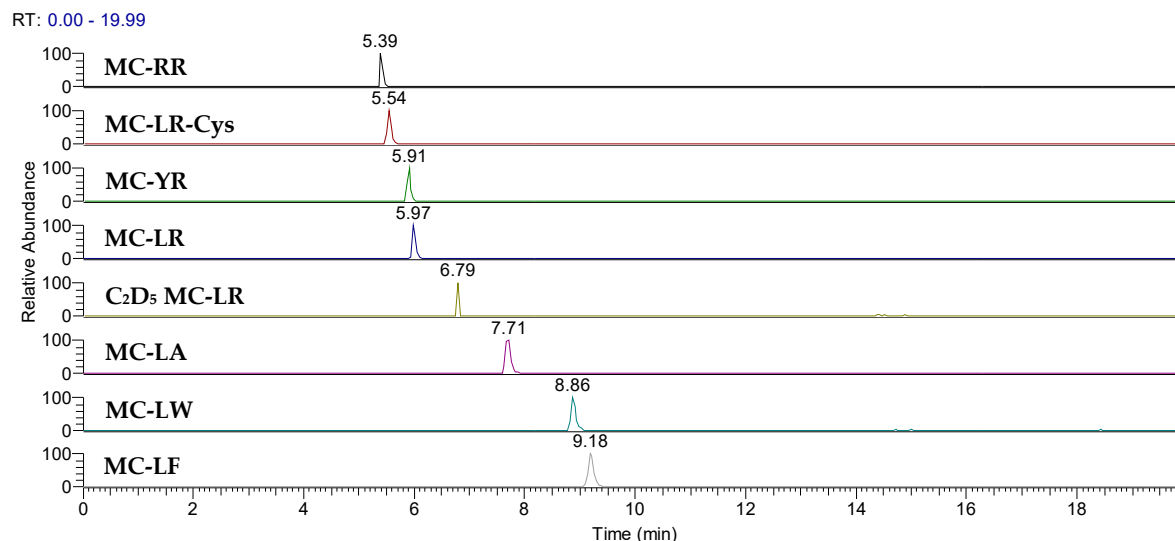

**Figure S3.** LC-SIM-MS chromatograms showing separation of 8 MCs.  $m/z$  values of detected monoisotopic MC ions are in Table S1.

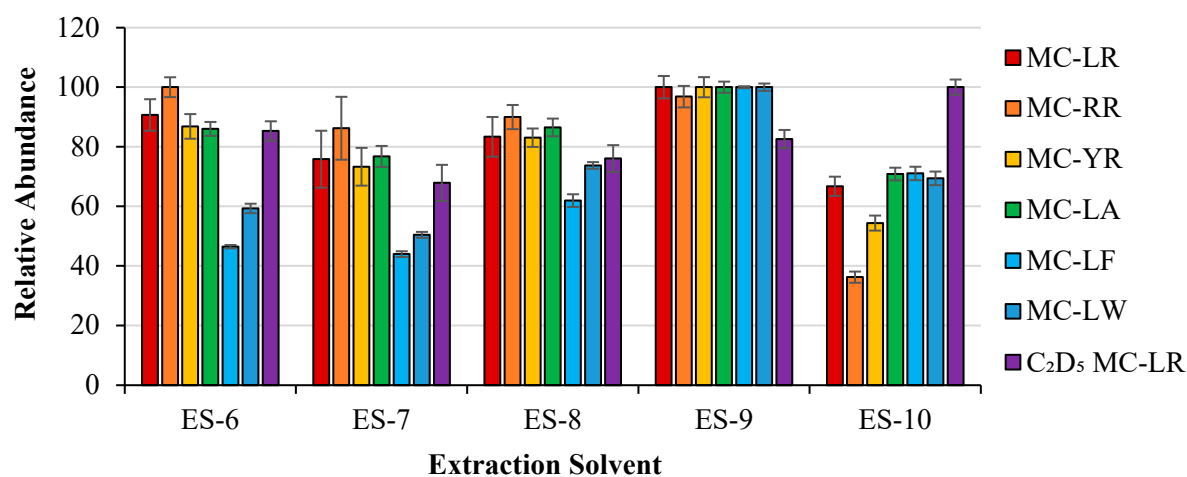

**Figure S4.** Relative abundances of 7 MCs spiked into 5 mouse liver samples and extracted using 5 different solvents: 55:45 (v:v) CH<sub>3</sub>CN:H<sub>2</sub>O containing 1% FA (ES-6), 65:35 (v:v) CH<sub>3</sub>CN:H<sub>2</sub>O containing 1% FA (ES-7), 75:25 (v:v) CH<sub>3</sub>CN:H<sub>2</sub>O containing 1% FA (ES-8), 85:15 (v:v) CH<sub>3</sub>CN:H<sub>2</sub>O containing 1% FA (ES-9), and CH<sub>3</sub>CN containing 1% FA (ES-10). Relative abundances were compared. Error bars are  $\pm$  standard deviation of triplicate LC-MS measurements.

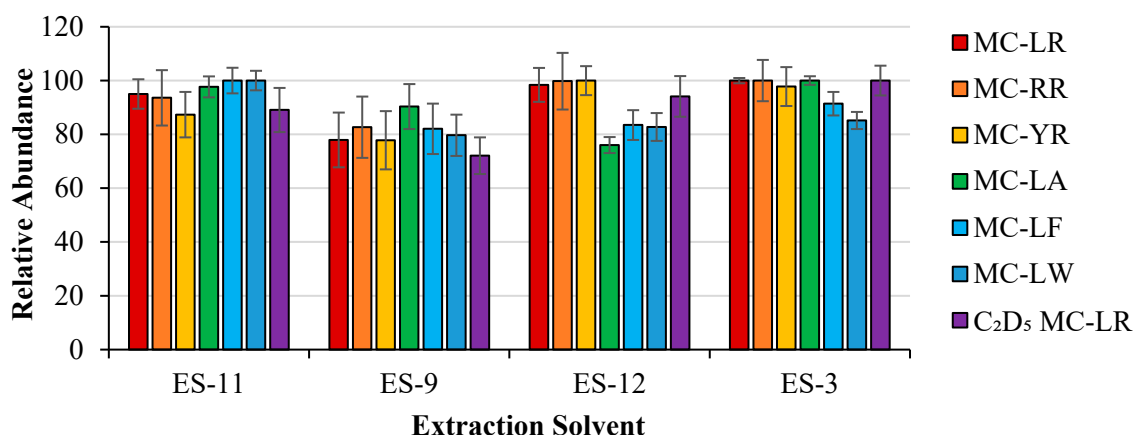

**Figure S5.** Relative abundances of 7 MCs spiked into 4 mouse liver samples and extracted using 4 different solvents: 85:15 (v:v) CH<sub>3</sub>CN:H<sub>2</sub>O containing 0.1% FA (ES-11), 85:15 (v:v) CH<sub>3</sub>CN:H<sub>2</sub>O containing 1% FA (ES-9), 85:15 (v:v) CH<sub>3</sub>CN:H<sub>2</sub>O containing 100 mM ZnSO<sub>4</sub> and 0.1% FA (ES-12), and 85:15 (v:v) CH<sub>3</sub>CN:H<sub>2</sub>O containing 100 mM ZnSO<sub>4</sub> and 1% FA (ES-3). Relative abundances were compared. Error bars are  $\pm$  standard deviation of triplicate LC-MS measurements.

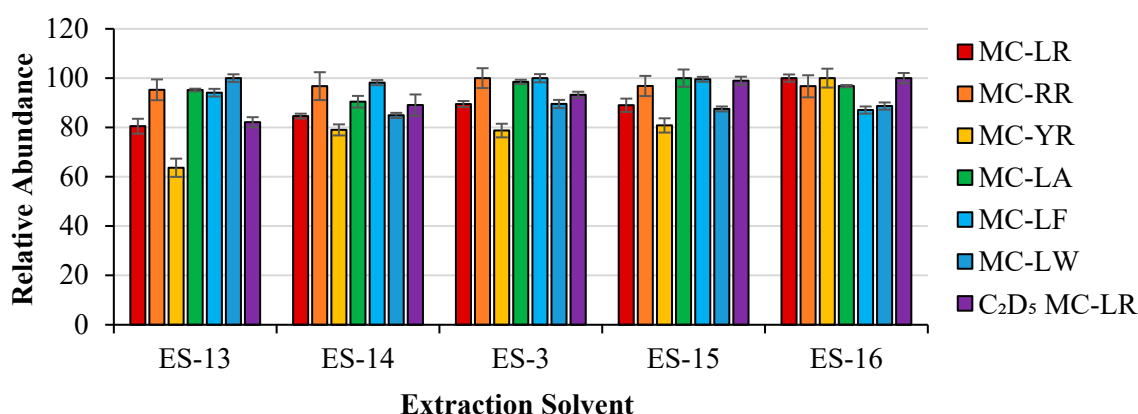

**Figure S6.** Relative abundances of 7 MCs spiked into 5 mouse liver samples and extracted using 5 different solvents: 85:15 (v:v) CH<sub>3</sub>CN:H<sub>2</sub>O containing 25 mM ZnSO<sub>4</sub> and 1% FA (ES-13), 85:15 (v:v) CH<sub>3</sub>CN:H<sub>2</sub>O containing 50 mM ZnSO<sub>4</sub> and 1% FA (ES-14), 85:15 (v:v) CH<sub>3</sub>CN:H<sub>2</sub>O containing 100 mM ZnSO<sub>4</sub> and 1% FA (ES-3), 85:15 (v:v) CH<sub>3</sub>CN:H<sub>2</sub>O containing 150 mM ZnSO<sub>4</sub> and 1% FA (ES-15), and 85:15 (v:v) CH<sub>3</sub>CN:H<sub>2</sub>O containing 200 mM ZnSO<sub>4</sub> and 1% FA (ES-16). Relative abundances were compared. Error bars are  $\pm$  standard deviation of triplicate LC-MS measurements.

A)

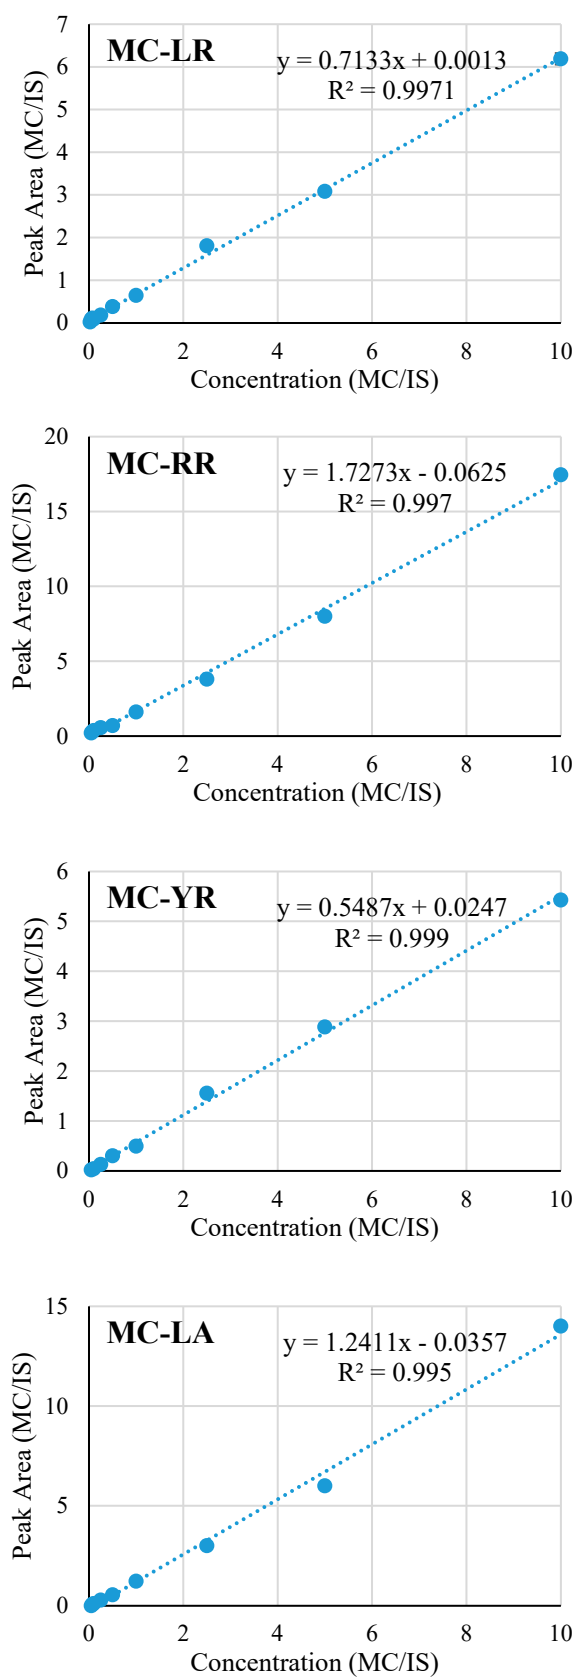

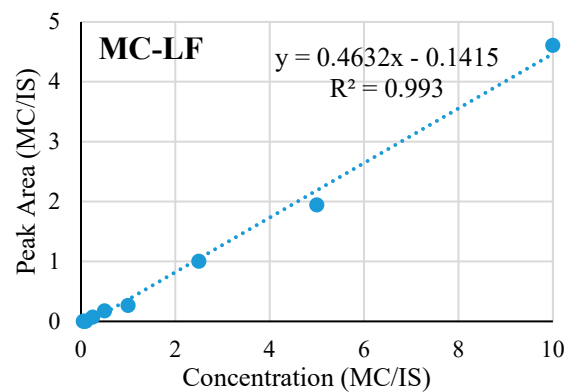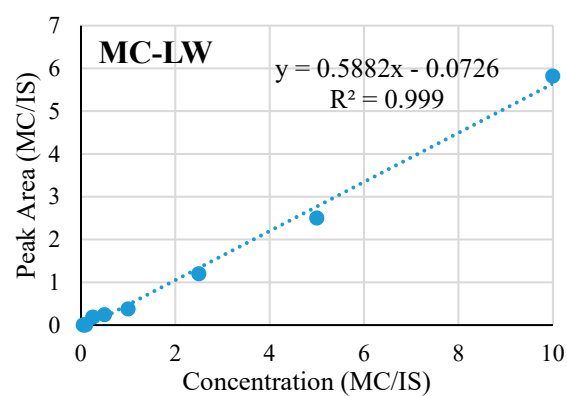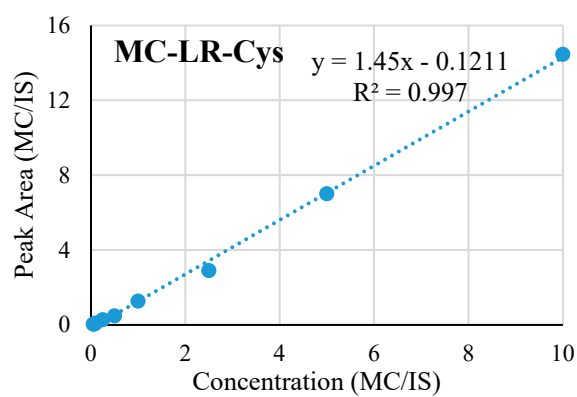

B)

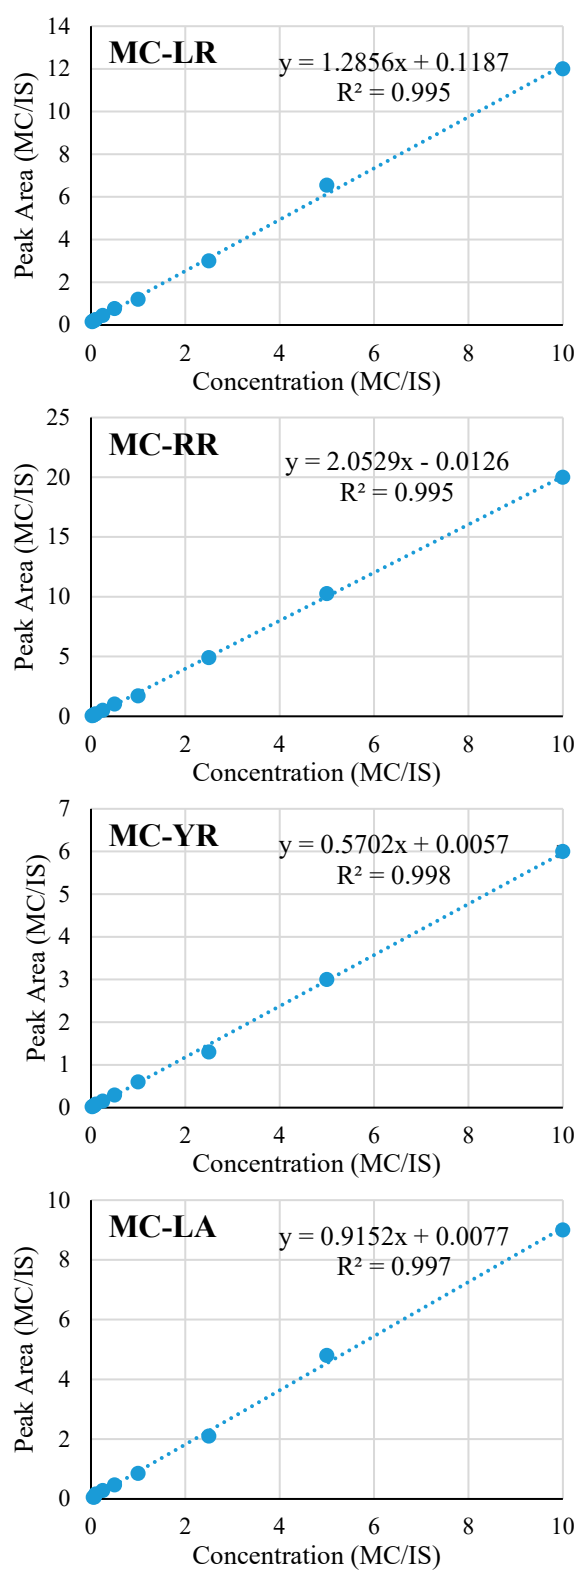

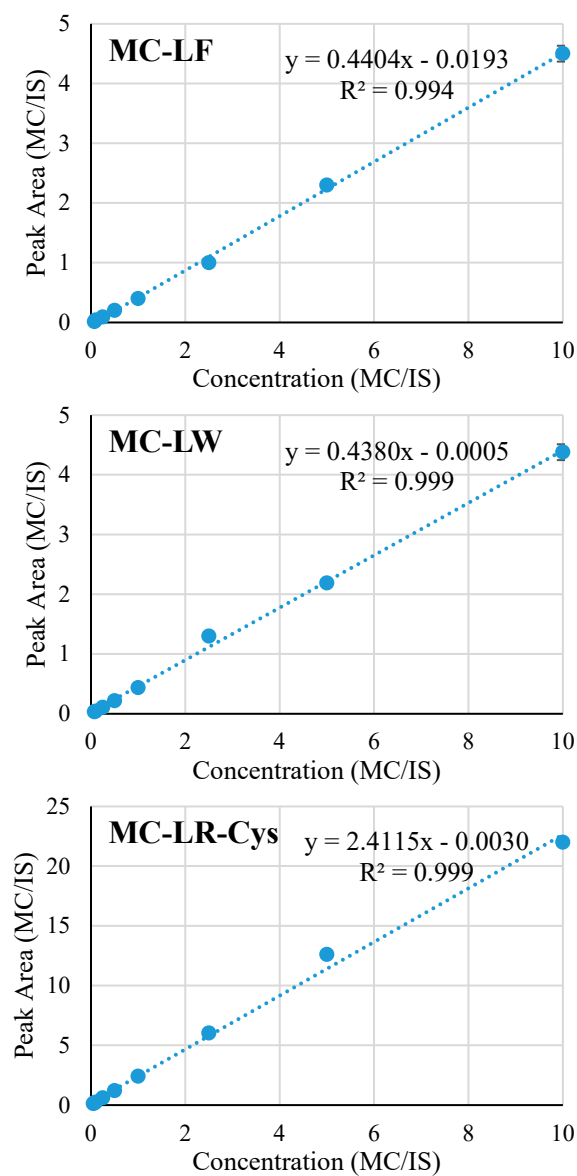

**Figure S7.** Matrix-matched internal standard (IS) calibration curves used to quantify 7 MCs extracted from A) wild-type and B) *Lepr<sup>db</sup>/J* mouse liver samples.

A)

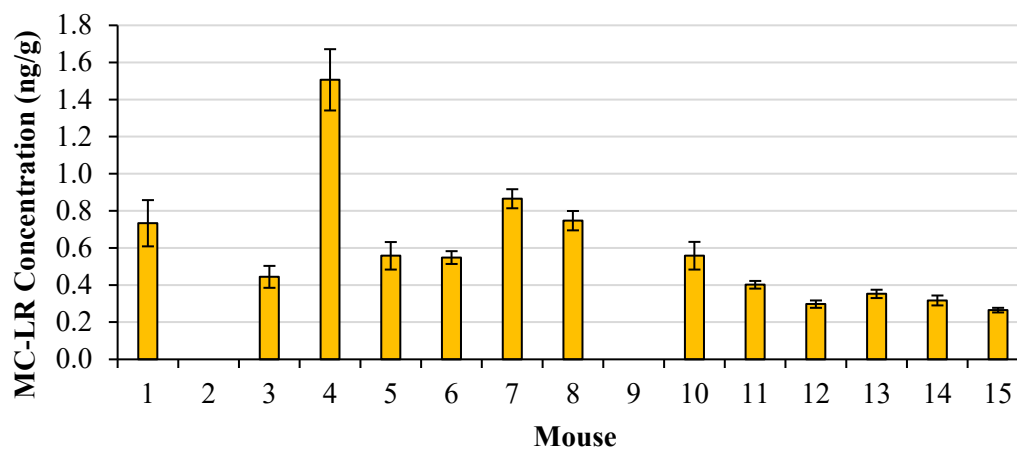

B)

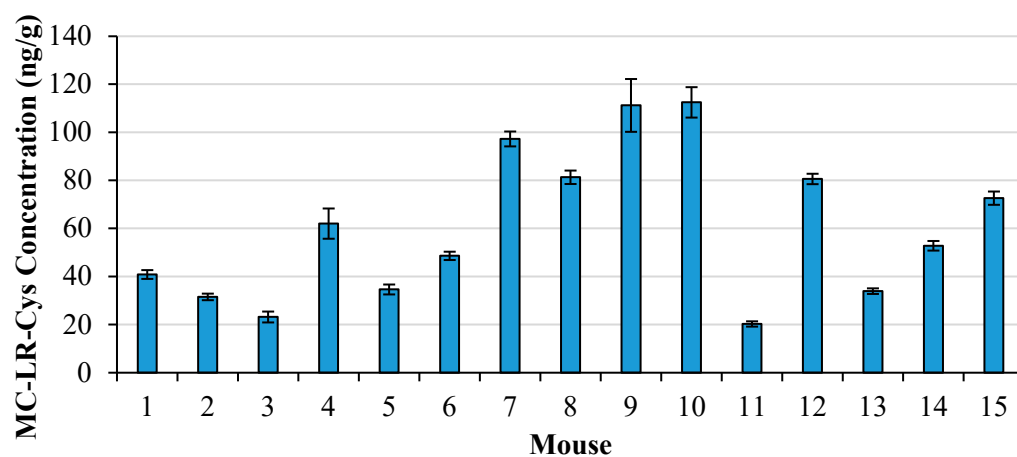

**Figure S8.** Concentration of **A)** MC-LR and **B)** MC-LR-Cys in the livers of wild-type mice gavaged with 100 µg MC-LR per kg bodyweight. The livers of mice 1–5 were harvested 2 hours after final gavage, the livers of mice 6–10 were harvested 4 hours after final gavage, and the livers of mice 11–15 were harvested 48 hours after final gavage. MCs were extracted from 40-mg liver samples that were spiked with internal standard. MC-LR in the livers of mice 2 and 9 was detected below the LOQ and could not be quantified. Error bars are  $\pm$  standard deviation of triplicate LC-MS measurements.

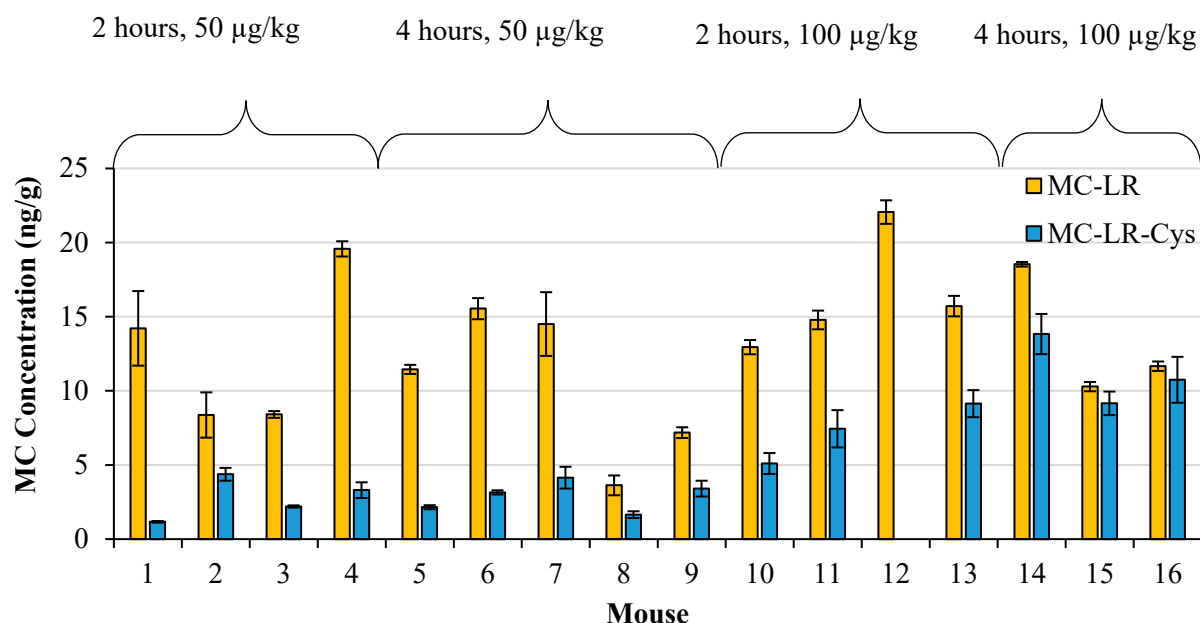

**Figure S9.** Concentration of MC-LR and MC-LR-Cys in the livers of *Lepr<sup>db</sup>/J* mice gavaged with MC-LR. Mice 1–9 were gavaged with 50 µg MC-LR per kg bodyweight, and mice 10–16 were gavaged with 100 µg MC-LR per kg bodyweight. Tissues of mice 1–4 and 10–13 were harvested 2 hours after final gavage, and tissues of mice 5–9 and 14–16 were harvested 4 hours after final gavage. MCs were extracted from 40-mg samples that were spiked with internal standard. MC-LR-Cys concentration in the liver of mouse 12 (45.75 ng/g) was found to be an outlier using Grubbs' test with 95% confidence, and removed. Error bars are  $\pm$  standard deviation of triplicate LC-MS measurements.

**Table S1.** Mass accuracies of detected monoisotopic MC ions.

| MC Congener                         | Ion formula                                                                       | Theoretical $m/z$ | Experimental $m/z$ | Accuracy (ppm) |
|-------------------------------------|-----------------------------------------------------------------------------------|-------------------|--------------------|----------------|
| MC-LR                               | $[\text{C}_{49}\text{H}_{74}\text{N}_{10}\text{O}_{12} + \text{H}]^+$             | 995.5560          | 995.5574           | 1.41           |
| MC-RR                               | $[\text{C}_{49}\text{H}_{75}\text{N}_{13}\text{O}_{12} + 2\text{H}]^{2+}$         | 519.7902          | 519.7907           | 0.96           |
| MC-YR                               | $[\text{C}_{52}\text{H}_{72}\text{N}_{10}\text{O}_{13} + \text{H}]^+$             | 1045.5353         | 1045.5368          | 1.43           |
| MC-LA                               | $[\text{C}_{46}\text{H}_{67}\text{N}_7\text{O}_{12} + \text{H}]^+$                | 910.4920          | 910.4935           | 1.65           |
| MC-LF                               | $[\text{C}_{52}\text{H}_{71}\text{N}_7\text{O}_{12} + \text{H}]^+$                | 986.5233          | 986.5247           | 1.42           |
| MC-LW                               | $[\text{C}_{54}\text{H}_{72}\text{N}_8\text{O}_{12} + \text{H}]^+$                | 1025.5342         | 1025.5356          | 1.37           |
| MC-LR-Cys                           | $[\text{C}_{52}\text{H}_{81}\text{N}_{11}\text{O}_{14}\text{S} + 2\text{H}]^{2+}$ | 558.7915          | 558.7923           | 1.43           |
| C <sub>2</sub> D <sub>5</sub> MC-LR | $[\text{C}_{51}\text{H}_{73}\text{D}_5\text{N}_{10}\text{O}_{12} + \text{H}]^+$   | 1028.6187         | 1028.6200          | 1.26           |

**Table S2.** Percent recoveries of 8 MCs spiked at 2 concentration levels into 20-mg mouse liver samples and extracted using the optimized procedure.

| MC Congener                         | 5 ng/g       |         | 100 ng/g     |         |
|-------------------------------------|--------------|---------|--------------|---------|
|                                     | Recovery (%) | RSD (%) | Recovery (%) | RSD (%) |
| MC-LR                               | 94.2         | 2.43    | 95.0         | 6.33    |
| MC-RR                               | 92.0         | 5.35    | 93.7         | 3.48    |
| MC-YR                               | 93.7         | 7.35    | 95.9         | 2.25    |
| MC-LA                               | 92.0         | 5.01    | 80.6         | 2.11    |
| MC-LF                               | 80.4         | 5.35    | 74.0         | 1.73    |
| MC-LW                               | 74.0         | 4.65    | 60.8         | 3.12    |
| MC-LR-Cys                           | 71.4         | 3.11    | 77.3         | 2.53    |
| C <sub>2</sub> D <sub>5</sub> MC-LR | 76.4         | 3.98    | 67.9         | 4.73    |

**Table S3.** Percent errors and relative standard deviations at the LOQs of 7 MCs. Calibration curve equations were used to calculate experimental value of LOQs.

| MC Congener | LOQ (ng/g) | Experimental value (ng/g) | Error (%) | RSD (%) |
|-------------|------------|---------------------------|-----------|---------|
| MC-LR       | 0.25       | 0.29                      | 16.24     | 13.62   |
| MC-RR       | 0.50       | 0.43                      | 13.78     | 19.81   |
| MC-YR       | 0.50       | 0.46                      | 8.72      | 14.08   |
| MC-LA       | 0.75       | 0.82                      | 9.74      | 3.30    |
| MC-LF       | 2.50       | 2.88                      | 15.08     | 9.11    |
| MC-LW       | 2.50       | 2.21                      | 11.63     | 4.62    |
| MC-LR-Cys   | 0.75       | 0.76                      | 1.88      | 3.15    |
